# Supplementary material for: Prevalence of Clinical Signs and Symptoms of Temporomandibular Joint Disorders Registered in the EUROTMJ Database: A Prospective Study in a Portuguese Center
Source: MDPI journal article supplement (doi:10.3390/jcm12103553), 2023-05-18
Supplement: s1 [file s1]

**Table S1.** Relative frequency (%) of the TMJ pain and clinical variables (open mouth limitation, clicks, crepitus and arthralgia) with demographic data, parafunctional habits, risk factors and other comorbidities. F – female; Male. Significant values are in bold.

[illegible]

|                       |                     |       |       |       |      |      |       |       |       |       |      |      |      |      |      |      |
|-----------------------|---------------------|-------|-------|-------|------|------|-------|-------|-------|-------|------|------|------|------|------|------|
| No                    | 14.62               | 44.34 | 31.60 | 9.44  | 30.0 | 70.0 | 16.58 | 16.06 | 30.57 | 36.79 | 14.8 | 85.2 | 80.5 | 19.5 | 52.1 | 47.9 |
| Yes                   | 12.78               | 32.22 | 39.44 | 15.56 | 31.6 | 68.4 | 7.14  | 10.12 | 33.33 | 49.41 | 14.0 | 86.0 | 77.6 | 22.4 | 47.3 | 52.7 |
|                       | Risk Factors        |       |       |       |      |      |       |       |       |       |      |      |      |      |      |      |
| Dental treatment      |                     |       |       |       |      |      |       |       |       |       |      |      |      |      |      |      |
| No                    | 16.90               | 34.58 | 35.95 | 12.57 | 33.1 | 66.9 | 14.61 | 12.33 | 34.02 | 39.04 | 14.4 | 85.6 | 79.3 | 20.7 | 49.7 | 50.3 |
| Yes                   | 15.12               | 39.53 | 27.91 | 17.44 | 25.6 | 74.4 | 14.29 | 15.58 | 32.47 | 37.66 | 12.8 | 87.2 | 73.7 | 26.3 | 61.0 | 39.0 |
| Orthodontic treatment |                     |       |       |       |      |      |       |       |       |       |      |      |      |      |      |      |
| No                    | 17.70               | 34.75 | 34.12 | 13.43 | 33.5 | 66.5 | 15.54 | 11.78 | 32.33 | 40.35 | 15.9 | 84.1 | 77.3 | 22.7 | 52.1 | 47.9 |
| Yes                   | 12.70               | 37.3  | 37.30 | 12.70 | 26.2 | 73.8 | 11.21 | 16.38 | 38.79 | 33.62 | 8.0  | 92.0 | 82.5 | 17.5 | 48.7 | 51.3 |
| Entubation            |                     |       |       |       |      |      |       |       |       |       |      |      |      |      |      |      |
| No                    | 16.96               | 35.14 | 34.96 | 12.94 | 32.7 | 67.3 | 14.57 | 12.96 | 34.41 | 38.06 | 14.6 | 85.4 | 79.0 | 21.0 | 51.5 | 48.5 |
| Yes                   | 8.70                | 39.13 | 30.43 | 21.74 | 13.0 | 87.0 | 14.29 | 9.52  | 19.05 | 57.14 | 4.3  | 95.7 | 65.0 | 35.0 | 47.8 | 52.2 |
| Orthognatic Surgery   |                     |       |       |       |      |      |       |       |       |       |      |      |      |      |      |      |
| No                    | 16.70               | 35.26 | 35.26 | 12.78 | 32.3 | 67.7 | 14.34 | 12.78 | 34.18 | 38.70 | 14.1 | 85.9 | 78.7 | 21.3 | 51.2 | 48.8 |
| Yes                   | 12.50               | 37.50 | 0.00  | 50.00 | 12.5 | 87.5 | 33.33 | 16.67 | 0.00  | 50.00 | 16.7 | 83.3 | 60.0 | 40.0 | 62.5 | 37.5 |
| Wisdom teeth removal  |                     |       |       |       |      |      |       |       |       |       |      |      |      |      |      |      |
| No                    | 17.54               | 35.70 | 33.82 | 12.94 | 33.5 | 66.5 | 14.21 | 12.75 | 33.33 | 39.71 | 15.7 | 84.3 | 78.7 | 21.3 | 50.9 | 49.1 |
| Yes                   | 12.93               | 33.62 | 38.79 | 14.66 | 25.9 | 74.1 | 15.89 | 13.09 | 35.51 | 35.51 | 8.0  | 92.0 | 77.7 | 22.3 | 52.8 | 47.2 |
| Jaw Trauma            |                     |       |       |       |      |      |       |       |       |       |      |      |      |      |      |      |
| No                    | 17.08               | 34.34 | 35.06 | 13.52 | 32.4 | 67.6 | 15.08 | 12.19 | 34.30 | 38.43 | 14.3 | 85.7 | 79.4 | 20.6 | 52.0 | 48.0 |
| Yes                   | 9.09                | 51.52 | 30.30 | 9.09  | 24.2 | 75.8 | 6.45  | 22.58 | 25.81 | 45.16 | 12.1 | 87.9 | 63.3 | 36.7 | 40.0 | 60   |
|                       | Other Comorbidities |       |       |       |      |      |       |       |       |       |      |      |      |      |      |      |

|                                                           |       |       |       |       |      |      |       |       |       |       |      |      |      |      |      |      |
|-----------------------------------------------------------|-------|-------|-------|-------|------|------|-------|-------|-------|-------|------|------|------|------|------|------|
| <b>Number of other Comorbidities</b>                      |       |       |       |       |      |      |       |       |       |       |      |      |      |      |      |      |
| 0                                                         | 21.09 | 38.66 | 28.75 | 11.50 | 32.1 | 67.9 | 20.08 | 15.83 | 35.14 | 28.95 | 12.1 | 87.9 | 78.9 | 21.1 | 52.7 | 47.3 |
| 1                                                         | 12.95 | 34.53 | 38.85 | 13.67 | 36.0 | 64.0 | 9.68  | 14.52 | 33.87 | 41.93 | 13.0 | 87.0 | 81.1 | 18.9 | 50.4 | 49.6 |
| ≥2                                                        | 10.49 | 28.67 | 44.06 | 16.78 | 28.0 | 72.0 | 8.33  | 5.30  | 31.06 | 55.31 | 19.3 | 80.7 | 75.0 | 25.0 | 49.2 | 50.8 |
| <b>Mental, behavioral or neurodevelopmental disorders</b> |       |       |       |       |      |      |       |       |       |       |      |      |      |      |      |      |
| No                                                        | 17.42 | 38.24 | 31.00 | 13.34 | 31.5 | 68.5 | 16.99 | 15.09 | 34.50 | 33.42 | 13.8 | 86.2 | 78.0 | 22.0 | 51.9 | 48.1 |
| Yes                                                       | 14.38 | 26.80 | 45.75 | 13.07 | 33.3 | 66.7 | 8.33  | 6.94  | 31.94 | 52.79 | 15.0 | 85.0 | 79.7 | 20.3 | 49.6 | 50.4 |
| <b>Diseases of the respiratory system</b>                 |       |       |       |       |      |      |       |       |       |       |      |      |      |      |      |      |
| No                                                        | 17.42 | 35.04 | 34.66 | 12.88 | 31.5 | 68.5 | 15.60 | 13.19 | 33.85 | 37.36 | 14.6 | 85.4 | 77.7 | 22.3 | 51.2 | 48.8 |
| Yes                                                       | 10.45 | 37.31 | 35.82 | 16.42 | 35.8 | 64.2 | 6.67  | 10.00 | 33.33 | 50.00 | 14.1 | 85.9 | 84.5 | 15.5 | 52.6 | 47.4 |
| <b>Endocrine, nutritional or metabolic diseases</b>       |       |       |       |       |      |      |       |       |       |       |      |      |      |      |      |      |
| No                                                        | 17.16 | 36.19 | 34.14 | 12.51 | 32.1 | 67.9 | 15.55 | 13.18 | 33.26 | 38.01 | 13.6 | 86.4 | 79.0 | 21.0 | 50.8 | 49.2 |
| Yes                                                       | 11.86 | 27.12 | 40.68 | 20.34 | 30.5 | 69.5 | 5.77  | 9.62  | 38.46 | 46.15 | 19.0 | 81.0 | 73.5 | 26.5 | 56.0 | 44.0 |
| <b>Diseases of the circulatory system</b>                 |       |       |       |       |      |      |       |       |       |       |      |      |      |      |      |      |
| No                                                        | 16.58 | 35.17 | 34.99 | 13.26 | 31.7 | 68.3 | 14.71 | 13.01 | 33.69 | 38.59 | 12.8 | 87.2 | 79.5 | 20.5 | 51.9 | 48.1 |
| Yes                                                       | 17.31 | 36.54 | 32.69 | 13.46 | 34.6 | 65.4 | 13.04 | 10.87 | 34.78 | 41.31 | 28.0 | 72.0 | 67.4 | 32.6 | 45.5 | 54.5 |

|                                                       |       |       |       |       |      |      |       |       |       |       |      |      |      |      |      |      |
|-------------------------------------------------------|-------|-------|-------|-------|------|------|-------|-------|-------|-------|------|------|------|------|------|------|
| <b>Diseases of the<br/>musculoskeletal<br/>system</b> |       |       |       |       |      |      |       |       |       |       |      |      |      |      |      |      |
| No                                                    | 17.17 | 35.60 | 34.53 | 12.70 | 31.7 | 68.3 | 14.40 | 13.17 | 33.95 | 38.48 | 14.1 | 85.9 | 79.1 | 20.9 | 50.7 | 49.3 |
| Yes                                                   | 8.33  | 30.56 | 38.89 | 22.22 | 36.1 | 63.9 | 17.24 | 6.90  | 31.03 | 44.83 | 14.3 | 85.7 | 66.7 | 33.3 | 61.3 | 38.7 |
